# Supplementary material
Source: PubMed Central journal article supplement (PMC6754236)
Supplement: DC190686SupplementaryData.pdf [file DC190686SupplementaryData.pdf]

## SUPPLEMENTARY DATA

### **Association between early hypertension control and cardiovascular disease incidence in Veterans with diabetes**

Sridharan Raghavan, Yuk-Lam Ho, Vinay Kini, Mary Rhee, Jason L. Vassy, David R. Gagnon, Kelly Cho, Peter W. F. Wilson, Lawrence S. Phillips

#### **Online-only Supplement**

**Table S1. Study participant characteristics across on-treatment systolic blood pressure achieved.**

**Table S2. ICD-10 diagnosis codes used to classify causes of death in the National Death Index.**

**Table S3. ICD-9 diagnosis codes used to classify baseline comorbidities.**

**Table S4. Frequency of each component of the ASCVD composite outcome across eight participant groups defined by pre- and on-treatment systolic blood pressure.**

**Table S5. Association of pre-treatment systolic blood pressure with ASCVD events, all-cause mortality, and cardiovascular disease mortality.**

**Table S6. Association of on-treatment systolic blood pressure with ASCVD events, all-cause mortality, and cardiovascular disease mortality.**

**Table S7. Association of pre-treatment systolic blood pressure with ASCVD events among individuals aged 55-65 years at baseline.**

**Table S8. Association of on-treatment systolic blood pressure with ASCVD events among individuals aged 55-65 years at baseline.**

**Table S9. Causes of death among study participants with diabetes and hypertension.**

SUPPLEMENTARY DATA

**Supplementary Table S1. Study participant characteristics across on-treatment systolic blood pressure achieved.**

|                                                 | On-treatment Systolic Blood Pressure (SBP) |                               |                                 |                                 |                            | p-value |
|-------------------------------------------------|--------------------------------------------|-------------------------------|---------------------------------|---------------------------------|----------------------------|---------|
|                                                 | SBP 100-119<br>mmHg<br>N=2966              | SBP 120-129<br>mmHg<br>N=9186 | SBP 130-139<br>mmHg<br>N=15,638 | SBP 140-159<br>mmHg<br>N=14,435 | SBP ≥160<br>mmHg<br>N=1761 |         |
| Age, mean ± SD (years)                          | 61.5 ± 10.8                                | 60.3 ± 10.3                   | 61.1 ± 10.4                     | 62.4 ± 10.2                     | 64.3 ± 10.3                | <0.001  |
| Male, n (%)                                     | 2879 (97.1)                                | 8919 (97.1)                   | 15,277 (97.7)                   | 14,099 (97.7)                   | 1732 (98.4)                | 0.003   |
| Race, n (%)                                     |                                            |                               |                                 |                                 |                            |         |
| <i>Black or African American</i>                | 411 (13.9)                                 | 1367 (14.9)                   | 2434 (15.6)                     | 2562 (17.7)                     | 387 (22)                   |         |
| <i>White</i>                                    | 2462 (83)                                  | 7508 (81.7)                   | 12,697 (81.2)                   | 11,411 (79.1)                   | 1323 (75.1)                | <0.001  |
| <i>Other</i>                                    | 93 (3.1)                                   | 311 (3.4)                     | 507 (3.2)                       | 462 (3.2)                       | 51 (2.9)                   |         |
| Ethnicity, n (%)                                |                                            |                               |                                 |                                 |                            |         |
| <i>Hispanic or Latino</i>                       | 186 (6.3)                                  | 676 (7.4)                     | 1219 (7.8)                      | 988 (6.8)                       | 114 (6.5)                  | 0.002   |
| <i>Not Hispanic or Unknown</i>                  | 2780 (93.7)                                | 8510 (92.6)                   | 14,419 (92.2)                   | 13,447 (93.2)                   | 1647 (93.5)                |         |
| CVD at baseline, n (%)                          | 730 (24.6)                                 | 1983 (21.6)                   | 3242 (20.7)                     | 3359 (23.3)                     | 483 (27.4)                 | <0.001  |
| Cancer at baseline, n (%)                       | 758 (25.6)                                 | 2320 (25.3)                   | 3654 (23.4)                     | 2984 (20.7)                     | 285 (16.2)                 | <0.001  |
| Mental Health Disease at baseline, n (%)        | 497 (16.8)                                 | 1669 (18.2)                   | 2605 (16.7)                     | 1910 (13.2)                     | 146 (8.3)                  | <0.001  |
| Kidney Disease at baseline, n (%)               | 27 (0.9)                                   | 56 (0.6)                      | 89 (0.6)                        | 127 (0.9)                       | 40 (2.3)                   | <0.001  |
| Smoking Status, n (%)                           |                                            |                               |                                 |                                 |                            |         |
| <i>Current</i>                                  | 590 (19.9)                                 | 1816 (19.8)                   | 2883 (18.4)                     | 2460 (17)                       | 242 (13.7)                 |         |
| <i>Former</i>                                   | 1802 (60.8)                                | 5532 (60.2)                   | 9639 (61.6)                     | 9074 (62.9)                     | 1114 (63.3)                | <0.001  |
| <i>Never</i>                                    | 574 (19.4)                                 | 1838 (20)                     | 3116 (19.9)                     | 2901 (20.1)                     | 405 (23)                   |         |
| BMI, mean ± SD (kg/m <sup>2</sup> )             | 31.4 ± 6                                   | 31.8 ± 5.9                    | 31.9 ± 6                        | 31.8 ± 6.1                      | 31.1 ± 6.3                 | <0.001  |
| Hemoglobin A1c, mean ± SD (% [mmol/mol])        | 7.4 ± 1.7<br>[57 ± 13]                     | 7.5 ± 1.7<br>[58 ± 13]        | 7.5 ± 1.7<br>[58 ± 13]          | 7.6 ± 1.8<br>[60 ± 14]          | 7.9 ± 2.0<br>[63 ± 16]     | <0.001  |
| Glucose, mean ± SD (mg/dL)                      | 154.9 ± 65.7                               | 155.8 ± 62.5                  | 156.9 ± 64.1                    | 161 ± 67.3                      | 165.6 ± 69.8               | <0.001  |
| Diabetes medications, n (%)                     |                                            |                               |                                 |                                 |                            |         |
| <i>None</i>                                     | 521 (17.6)                                 | 1569 (17.1)                   | 2642 (16.9)                     | 2524 (17.5)                     | 367 (20.8)                 |         |
| <i>Regimens with insulin</i>                    | 527 (17.8)                                 | 1792 (19.5)                   | 3163 (20.2)                     | 3134 (21.7)                     | 375 (21.3)                 | <0.001  |
| <i>Regimens without insulin</i>                 | 1918 (64.7)                                | 5825 (63.4)                   | 9833 (62.9)                     | 8777 (60.8)                     | 1019 (57.9)                |         |
| Total Cholesterol, mean ± SD (mg/dL)            | 184.9 ± 44                                 | 185.2 ± 43.7                  | 186.2 ± 43.5                    | 188 ± 44.6                      | 189.9 ± 43.9               | <0.001  |
| HDL Cholesterol, mean ± SD (mg/dL)              | 41.2 ± 11.8                                | 41 ± 11.6                     | 41.2 ± 11.4                     | 42 ± 11.6                       | 42.5 ± 12.2                | <0.001  |
| LDL Cholesterol, mean ± SD (mg/dL)              | 108.4 ± 35.2                               | 108.4 ± 35.3                  | 109.6 ± 35                      | 111 ± 36.4                      | 113.6 ± 37.4               | <0.001  |
| Triglyceride, mean ± SD (mg/dL)                 | 192.2 ± 155.2                              | 196 ± 184.4                   | 194.7 ± 197.7                   | 189 ± 157.2                     | 181.9 ± 132.5              | 0.001   |
| Lipid medications, n (%)                        | 2205 (74.3)                                | 6696 (72.9)                   | 11,156 (71.3)                   | 9724 (67.4)                     | 1066 (60.5)                | <0.001  |
| eGFR, mean ± SD (ml/min/1.73m <sup>2</sup> )    | 80.8 ± 19                                  | 82.5 ± 18.3                   | 82.1 ± 18.2                     | 80.3 ± 19.3                     | 75.9 ± 21                  | <0.001  |
| Elixhauser score, mean ± SD                     | -2.7 ± 6.2                                 | -3 ± 6.2                      | -3 ± 5.9                        | -2.6 ± 5.6                      | -1.9 ± 5                   | <0.001  |
| Systolic Blood Pressure, mean ± SD (mmHg)       | 141.5 ± 9.8                                | 142.1 ± 9.6                   | 144.6 ± 10.3                    | 150.3 ± 12.6                    | 160.3 ± 16                 | <0.001  |
| Diastolic Blood Pressure, mean ± SD (mmHg)      | 79.5 ± 8.1                                 | 80.2 ± 7.9                    | 80.2 ± 8.1                      | 81.2 ± 8.8                      | 83.7 ± 10.6                | <0.001  |
| Number of blood pressure medications, mean ± SD | 1 (1, 2)                                   | 1 (1, 2)                      | 1 (1, 2)                        | 1 (1, 2)                        | 2 (1, 3)                   | <0.001  |
| Anti-hypertensive class, n (%)                  |                                            |                               |                                 |                                 |                            |         |
| <i>ACE-inhibitor/ARB</i>                        | 1874 (63.2)                                | 5747 (62.6)                   | 9547 (61.1)                     | 8882 (61.5)                     | 1076 (61.1)                | 0.06    |
| <i>Calcium channel blocker</i>                  | 231 (7.8)                                  | 823 (9)                       | 1989 (12.7)                     | 3065 (21.2)                     | 560 (31.8)                 | <0.001  |
| <i>Beta-blocker</i>                             | 736 (24.8)                                 | 1979 (21.5)                   | 3110 (19.9)                     | 3749 (26)                       | 687 (39)                   | <0.001  |
| <i>Diuretic</i>                                 | 576 (19.4)                                 | 1750 (19.1)                   | 3436 (22)                       | 4541 (31.5)                     | 710 (40.3)                 | <0.001  |
| Follow-up time, mean ± SD (years)               | 9.1 ± 2.0                                  | 9.4 ± 1.9                     | 9.3 ± 1.9                       | 9.4 ± 2.0                       | 9.1 ± 2.3                  | <0.001  |

## SUPPLEMENTARY DATA

Abbreviations: **CVD**, Cardiovascular disease; **SBP**, Systolic blood pressure; **BMI**, Body mass index; **HDL**, High density lipoprotein; **LDL**, Low density lipoprotein; **eGFR**, Estimated glomerular filtration rate; **ACE**, Angiotensin converting enzyme; **ARB**, Angiotensin receptor blocker

SUPPLEMENTARY DATA

**Supplementary Table S2. ICD-10 diagnosis codes used to classify causes of death in the National Death Index.**

| Causes of death                                                                              | ICD-10 codes                                                                                                                                                                                                         |
|----------------------------------------------------------------------------------------------|----------------------------------------------------------------------------------------------------------------------------------------------------------------------------------------------------------------------|
| Abnormal/Accident<br><i>Homicide</i><br><i>Exposure</i><br><i>Collision</i><br><i>Terror</i> | X85 or Y00-Y09<br>X00-X59, Y10-Y90 except Y87<br>Vx<br>Ux                                                                                                                                                            |
| Cancer                                                                                       | D00-D48,9, all of C, K31.7, K635, Q850                                                                                                                                                                               |
| Cardiovascular diseases                                                                      | I10-I16, I20-I25, I27-I28, I34-I37, I42, I44-I51, I60-I75, I77-I78, I97, I99, R00, R58, G45                                                                                                                          |
| Cirrhosis                                                                                    | K70.2, K70.3, K74.0, K74.6, K74.3, K74.4, K74.5                                                                                                                                                                      |
| COPD                                                                                         | J44                                                                                                                                                                                                                  |
| Chronic Kidney Disease                                                                       | B52.0, C68.9, D59.3, I12.0, I13.1, I13.2, I70.1, I72.2, I77.3, K76.7, M05x, M06x, M08x, M10.3, M12.0, N00x, N01x, N02x, N03x, N04x, N05x, N06x, N07x, N13.1, N13.2, N14x, N17x, N18x, N19x, Q61, Q62.0, Q62.2, R94.4 |
| Dialysis                                                                                     | Z91.15, Z99.2, Z49, T82.81                                                                                                                                                                                           |
| Diabetes                                                                                     | E10, E11, E13, E14                                                                                                                                                                                                   |
| Infectious                                                                                   | Ax, Bx, L00-L08, B20                                                                                                                                                                                                 |
| Mental Illness                                                                               | F20-F439, F601, F940, X60-X84, G301, G300, G308, G309                                                                                                                                                                |

SUPPLEMENTARY DATA

**Supplementary Table S3. ICD-9 diagnosis codes used to classify baseline comorbidities.**

| Condition                                                      | ICD-9 Codes                                                                                                                                                                                                                                                                                                                                                                                                                                                                                                                       |
|----------------------------------------------------------------|-----------------------------------------------------------------------------------------------------------------------------------------------------------------------------------------------------------------------------------------------------------------------------------------------------------------------------------------------------------------------------------------------------------------------------------------------------------------------------------------------------------------------------------|
| CVD including MI, TIA, stroke, or peripheral vascular disease  | 430-438, 410-414, 440.2-440.4, 443.9                                                                                                                                                                                                                                                                                                                                                                                                                                                                                              |
| Chronic Kidney Disease (CKD) or End Stage Renal Disease (ESRD) | 403.01, 403.11, 403.91, 404.02, 404.03, 404.12, 404.13, 404.92, 404.93; 585.5, 585.6, 585.3, 585.4                                                                                                                                                                                                                                                                                                                                                                                                                                |
| Liver Disease                                                  | 571.0, 571.1, 571.3, 571.4, 571.8, 571.9                                                                                                                                                                                                                                                                                                                                                                                                                                                                                          |
| Hepatitis                                                      | 573.3, 070.1, 070.2, 070.3, 070.4, 070.5, 070.6, 070.7, 070.8, 070.9                                                                                                                                                                                                                                                                                                                                                                                                                                                              |
| Dialysis                                                       | V45.1, V56.xx, 996.73, procedure code 38.95                                                                                                                                                                                                                                                                                                                                                                                                                                                                                       |
| Cancer, other than non-melanoma skin cancer                    | 140.00-239.00, <b>except</b> 173.2, 173.4 and 173.9                                                                                                                                                                                                                                                                                                                                                                                                                                                                               |
| Major mental health disorder: schizophrenia                    | 295, 301.2, 313.2                                                                                                                                                                                                                                                                                                                                                                                                                                                                                                                 |
| Alzheimer's Disease                                            | 331.0                                                                                                                                                                                                                                                                                                                                                                                                                                                                                                                             |
| Dementia                                                       | 290.x, 291.2, 294.1, 331.x (exclude 331.83), 333.0, 333.4, 797.x, 332.0, 294.8, 046.1, 046.3                                                                                                                                                                                                                                                                                                                                                                                                                                      |
| Cirrhosis                                                      | 571.2, 571.5, 571.6                                                                                                                                                                                                                                                                                                                                                                                                                                                                                                               |
| Anemia                                                         | 280-285                                                                                                                                                                                                                                                                                                                                                                                                                                                                                                                           |
| Arthritis                                                      | 274, 446.5, 710.9, 714.0-714.2, 714.4, 714.89-715, 716.1-716.39, 716.5-716.9, 725                                                                                                                                                                                                                                                                                                                                                                                                                                                 |
| Fatigue                                                        | 780.71, 780.79                                                                                                                                                                                                                                                                                                                                                                                                                                                                                                                    |
| Gait Abnormality or difficulty walking                         | 719.7, 781.2-781.4                                                                                                                                                                                                                                                                                                                                                                                                                                                                                                                |
| Depression/anxiety                                             | 296, 300.0-300.9, 309.0-309.1, 311                                                                                                                                                                                                                                                                                                                                                                                                                                                                                                |
| Hyperlipidemia                                                 | 272.4                                                                                                                                                                                                                                                                                                                                                                                                                                                                                                                             |
| Hypertension                                                   | 401-105, 437.2                                                                                                                                                                                                                                                                                                                                                                                                                                                                                                                    |
| Atrial Fibrillation                                            | 427.31                                                                                                                                                                                                                                                                                                                                                                                                                                                                                                                            |
| Sleep Apnea                                                    | 327.2, 780.53, 780.57                                                                                                                                                                                                                                                                                                                                                                                                                                                                                                             |
| COPD                                                           | 490-491, 492.0, 492.8, 493.2, 496                                                                                                                                                                                                                                                                                                                                                                                                                                                                                                 |
| Schizophrenia                                                  | 295                                                                                                                                                                                                                                                                                                                                                                                                                                                                                                                               |
| Substance                                                      | 304, 305.2-305.9                                                                                                                                                                                                                                                                                                                                                                                                                                                                                                                  |
| Diabetes                                                       | 250 - at least 1 PCP code OR [2 codes elsewhere AND use of diabetes specific medications (see list below)]                                                                                                                                                                                                                                                                                                                                                                                                                        |
| Amputation                                                     | Procedure code: V49.7x;                                                                                                                                                                                                                                                                                                                                                                                                                                                                                                           |
| CABG/PCI                                                       | CPT codes: 24900, 24920, 24930, 27025, 27027, 27122, 27215-27218, 27226-27228, 27235, 27236, 27244, 27245, 27248, 27254, 27590, 27594, 27880, 27881, 27886, 27888, 28805; VA rated disability condition ('Amputation', 'Prosthetic')<br>Procedure codes: V45.28, 00.66, 0.66, 36.01-36.02, 36.05, 36.10-36.17, 36.19<br>CPT codes: 33510-33514, 33516-33523, 33533-33536, 33572, 92920-92921, 92924-92925, 92933-92934, 92937-92938, 92941, 92943-92944, 92982, 92984, 92995-92996, 93540, 93564, 93570, C9602-C9608, S2205-S2209 |
| Medications                                                    |                                                                                                                                                                                                                                                                                                                                                                                                                                                                                                                                   |
| Diabetes medications                                           | Exenatide, Insulin, Acetohexamide, Alogliptin, Canagliflozin, Chlorpropamide, Dapagliflozin, Empagliflozin, Glimepiride, Glipizide, Glyburide, Linagliptin, Metformin, Nateglinide, Pioglitazone, Repaglinide, Rosiglitazone, Saxagliptin, Sitagliptin, Tolazamide, Tolbutamide, Troglitazone, Albiglutide, Dulaglutide, Liraglutide, Lixisenatide, Pramlintide                                                                                                                                                                   |
| Statin                                                         | Atorvastatin, Cerivastatin, Fluvastatin, Lovastatin, Pitavastatin, Pravastatin, Rosuvastatin, Simvastatin                                                                                                                                                                                                                                                                                                                                                                                                                         |

SUPPLEMENTARY DATA

**Supplementary Table S4. Frequency of each component of the ASCVD composite outcome across eight participant groups defined by pre- and on-treatment systolic blood pressure.**

| SBP at treatment initiation (mmHg) | On-treatment SBP    | <u>Myocardial infarction</u> |            |
|------------------------------------|---------------------|------------------------------|------------|
|                                    |                     | Non-fatal                    | Fatal      |
| 130-139                            | 100-119 (N= 658)    | 35 (5.3%)                    | 9 (1.4%)   |
|                                    | 120-129 (N= 2158)   | 98 (4.5%)                    | 22 (1.0%)  |
|                                    | 130-139 (N= 2966)   | 129 (4.3%)                   | 28 (0.9%)  |
|                                    | 140-159 (N= 1859)   | 102 (5.5%)                   | 32 (1.7%)  |
| ≥140                               | 100-119 (N= 1689)   | 82 (4.9%)                    | 25 (1.5%)  |
|                                    | 120-129 (N= 5548)   | 282 (5.1%)                   | 63 (1.1%)  |
|                                    | 130-139 (N= 10,888) | 500 (4.6%)                   | 145 (1.3%) |
|                                    | 140-159 (N= 11,663) | 584 (5.0%)                   | 221 (1.9%) |
| SBP at treatment initiation (mmHg) | On-treatment SBP    | <u>Stroke</u>                |            |
|                                    |                     | Non-fatal                    | Fatal      |
| 130-139                            | 100-119 (N= 658)    | 17 (2.6%)                    | 0 (0.0%)   |
|                                    | 120-129 (N= 2158)   | 71 (3.3%)                    | 1 (0.0%)   |
|                                    | 130-139 (N= 2966)   | 125 (4.2%)                   | 0 (0.0%)   |
|                                    | 140-159 (N= 1859)   | 105 (5.6%)                   | 1 (0.1%)   |
| ≥140                               | 100-119 (N= 1689)   | 61 (3.6%)                    | 1 (0.1%)   |
|                                    | 120-129 (N= 5548)   | 229 (4.1%)                   | 1 (0.0%)   |
|                                    | 130-139 (N= 10,888) | 464 (4.3%)                   | 6 (0.1%)   |
|                                    | 140-159 (N= 11,663) | 713 (6.1%)                   | 10 (0.1%)  |

SUPPLEMENTARY DATA

**Supplementary Table S5. Association of pre-treatment systolic blood pressure with ASCVD events, all-cause mortality, and cardiovascular disease mortality.**

| Pre-treatment SBP (mmHg) | <u>ASCVD events</u>   |         | <u>CVD mortality</u>  |         | <u>All-cause mortality</u> |         |
|--------------------------|-----------------------|---------|-----------------------|---------|----------------------------|---------|
|                          | Hazard Ratio (95% CI) | p-value | Hazard Ratio (95% CI) | p-value | Hazard Ratio (95% CI)      | p-value |
| <b>130-139</b>           | Ref                   | -       | Ref                   | -       | Ref                        | -       |
| <b>≥140</b>              | 1.10 (1.02, 1.19)     | 0.02    | 1.25 (1.10, 1.43)     | 0.0007  | 1.15 (1.08, 1.23)          | <0.0001 |

Abbreviations: **ASCVD**, Atherosclerotic cardiovascular disease; **CVD**, Cardiovascular disease; **SBP**, Systolic blood pressure

SUPPLEMENTARY DATA

**Supplementary Table S6. Association of on-treatment systolic blood pressure with ASCVD events, all-cause mortality, and cardiovascular disease mortality.**

| On-treatment SBP (mmHg) | ASCVD events          |         | CVD mortality         |         | All-cause mortality   |         |
|-------------------------|-----------------------|---------|-----------------------|---------|-----------------------|---------|
|                         | Hazard Ratio (95% CI) | p-value | Hazard Ratio (95% CI) | p-value | Hazard Ratio (95% CI) | p-value |
| <b>100-119</b>          | 0.90 (0.76, 1.06)     | 0.2     | 1.19 (0.93, 1.51)     | 0.16    | 1.16 (1.02, 1.31)     | 0.02    |
| <b>120-129</b>          | Ref                   | -       | Ref                   | -       | Ref                   | -       |
| <b>130-139</b>          | 1.03 (0.93, 1.14)     | 0.5     | 1.02 (0.87, 1.20)     | 0.8     | 0.91 (0.83, 0.98)     | 0.02    |
| <b>140-159</b>          | 1.24 (1.13, 1.37)     | <0.0001 | 1.14 (0.98, 1.34)     | 0.1     | 0.98 (0.90, 1.06)     | 0.6     |
| <b>≥160</b>             | 1.57 (1.34, 1.85)     | <0.0001 | 1.90 (1.53, 2.36)     | <0.0001 | 1.38 (1.22, 1.57)     | <0.0001 |

Abbreviations: **ASCVD**, Atherosclerotic cardiovascular disease; **CVD**, Cardiovascular disease; **SBP**, Systolic blood pressure



SUPPLEMENTARY DATA

**Supplementary Table S7. Association of pre-treatment systolic blood pressure with ASCVD events among individuals aged 55-65 years at baseline.**

| Pre-treatment SBP (mmHg) | ASCVD events          |         |
|--------------------------|-----------------------|---------|
|                          | Hazard Ratio (95% CI) | p-value |
| 130-139                  | Ref                   | -       |
| ≥140                     | 1.08 (0.96, 1.21)     | 0.2     |

Abbreviations: **ASCVD**, Atherosclerotic cardiovascular disease

SUPPLEMENTARY DATA

**Supplementary Table S8. Association of on-treatment systolic blood pressure with ASCVD events among individuals aged 55-65 years at baseline.**

| On-treatment SBP (mmHg) | ASCVD events          |         |
|-------------------------|-----------------------|---------|
|                         | Hazard Ratio (95% CI) | p-value |
| <b>100-119</b>          | 0.95 (0.73, 1.23)     | 0.7     |
| <b>120-129</b>          | Ref                   | -       |
| <b>130-139</b>          | 1.04 (0.90, 1.21)     | 0.6     |
| <b>140-159</b>          | 1.19 (1.02, 1.38)     | 0.02    |
| <b>≥160</b>             | 1.55 (1.20, 2.00)     | 0.0007  |

Abbreviations: **ASCVD**, Atherosclerotic cardiovascular disease

SUPPLEMENTARY DATA

**Supplementary Table S9. Causes of death among study participants with diabetes and hypertension.**

| Causes of death *       | All participants<br>n (%) | On-treatment systolic blood pressure (mm Hg) |                  |                  |                  |               |
|-------------------------|---------------------------|----------------------------------------------|------------------|------------------|------------------|---------------|
|                         |                           | 100-119<br>n (%)                             | 120-129<br>n (%) | 130-139<br>n (%) | 140-159<br>n (%) | ≥160<br>n (%) |
| Cardiovascular diseases | 1559 (29.0%)              | 108 (26.7%)                                  | 239 (24.7%)      | 463 (28.6%)      | 599 (30.5%)      | 150 (35.9%)   |
| Cancer                  | 1261 (23.5%)              | 109 (27.0%)                                  | 256 (26.4%)      | 399 (24.7%)      | 429 (21.8%)      | 68 (16.3%)    |
| COPD                    | 269 (5.0%)                | 28 (6.9%)                                    | 57 (5.9%)        | 66 (4.1%)        | 101 (5.1%)       | 17 (4.1%)     |
| Diabetes                | 494 (9.2%)                | 31 (7.7%)                                    | 76 (7.9%)        | 144 (8.9%)       | 187 (9.5%)       | 56 (13.4%)    |
| Chronic kidney disease  | 157 (2.9%)                | 9 (2.2%)                                     | 26 (2.7%)        | 33 (2.0%)        | 70 (3.6%)        | 19 (4.5%)     |
| Infection               | 140 (2.6%)                | 7 (1.7%)                                     | 23 (2.4%)        | 33 (2.0%)        | 63 (3.2%)        | 14 (3.3%)     |
| Mental illness          | 179 (3.3%)                | 14 (3.5%)                                    | 33 (3.4%)        | 60 (3.7%)        | 65 (3.3%)        | 7 (1.7%)      |
| Abnormal/Accident       | 96 (1.8%)                 | 9 (2.2%)                                     | 21 (2.2%)        | 33 (2.0%)        | 26 (1.3%)        | 7 (1.7%)      |
| Other chronic diseases  | 3 (0.1%)                  | 0 (0.0%)                                     | 2 (0.2%)         | 1 (0.1%)         | 0 (0.0%)         | 0 (0.0%)      |
| All other               | 1214 (22.6%)              | 89 (22.0%)                                   | 235 (24.3%)      | 385 (23.8%)      | 425 (21.6%)      | 80 (19.1%)    |

Abbreviations: **COPD**, Chronic obstructive pulmonary disease

\* Causes of death are classified based on the definitions used in the National Death Index using ICD-10 codes listed in Table S2.
